# Supplementary material
Source: publisher site journal article supplement (https://www.spandidos-publications.com/2919/downloadSupplementary)
Supplement: Supplementary file 1 [file downloadSupplementary]

Table SI. Influence of eating habits on the risk of GDM in pregnant females.

| Food category <sup>a</sup> | P-value <sup>b</sup> | Odds ratio | 95% CI     | P-value |
|----------------------------|----------------------|------------|------------|---------|
| Cereals                    | n.s.                 | 0.78       | 0.32-1.11  | n.s.    |
| Vegetables                 | n.s.                 | 1.22       | 0.67-3.88  | n.s.    |
| Fruit                      | n.s.                 | 1.35       | 1.04-5.32  | n.s.    |
| Dairy products             | 0.02                 | 3.55       | 2.11-7.98  | 0.02    |
| Sweet beverages            | 0.01                 | 7.04       | 5.99-12.34 | 0.01    |

<sup>a</sup>Overview of differences in daily consumption of food intake between females with and without GDM and calculated Odds ratios of developing GDM between the two categories of particular food consumption, i.e. 'once a day or more' ( $\geq 1$ ) and 'less than once a day' ( $< 1$ ). <sup>b</sup>GDM compared with controls, Fisher's exact test. GDM, gestational diabetes mellitus; n.s. no significance.

Table SII. Allele distribution of additional candidate SNPs located in the 3'-untranslated region of protein tyrosine phosphatase receptor type D.

| SNP         | Allele | P-value |
|-------------|--------|---------|
| rs62536166  | A/C    | 0.12    |
| rs77547574  | C/A    | 0.19    |
| rs73428138  | C/T    | 0.33    |
| rs117224071 | A/G    | 0.09    |
| rs77185985  | T/G    | 0.07    |
| rs114870484 | C/G    | 0.11    |
| rs73428138  | C/T    | 0.18    |
| rs10976945  | A/C    | 0.34    |
| rs1064270   | C/T    | 0.61    |
| rs116361362 | A/G    | 0.12    |
| rs75115513  | A/T    | 0.22    |
| rs117795823 | C/T    | 0.33    |
| rs74775961  | A/G    | 0.41    |
| rs28554480  | A/G    | 0.07    |
| rs11542527  | A/G    | 0.89    |
| rs79554842  | A/C    | 0.94    |

The P-value was calculated by comparing the mutant allele with wild-type allele using the chi-squared test. SNP, single nucleotide polymorphism.
